# Supplementary material for: Interplay of Genetic Risk Factors ( CHRNA5 - CHRNA3 - CHRNB4 ) and Cessation Treatments in Smoking Cessation Success
Source: Atypon-hosted journal article supplement (doi:10.1176/appi.ajp.2012.11101545), 2012-05-30
Supplement: appi.ajp.2012.11101545.ds001.pdf [file appi.ajp.2012.11101545.ds001.pdf]

 


Psychiatry Online
