# Supplementary material for: Interplay of Genetic Risk Factors ( CHRNA5 - CHRNA3 - CHRNB4 ) and Cessation Treatments in Smoking Cessation Success
Source: Atypon-hosted journal article supplement (doi:10.1176/appi.ajp.2012.11101545), 2012-05-30
Supplement: appi.ajp.2012.11101545.ds001.pdf [file appi.ajp.2012.11101545.ds001.pdf]

Figure S1. Interaction of Haplotypic Risk and Treatment Effect on Days to Relapse After Quitting

a. Entire Sample (N=1015)

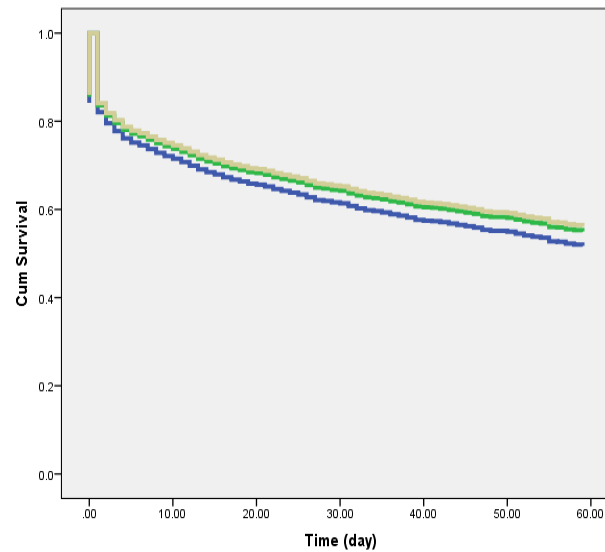

b. Placebo group (N=117)

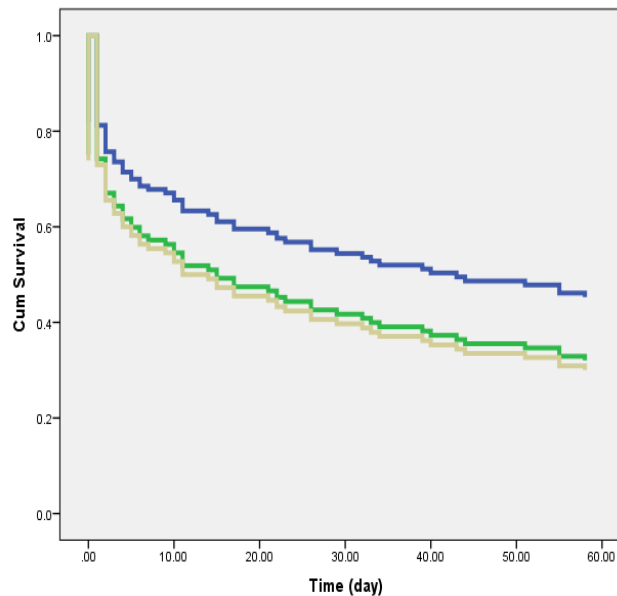

c. Treatment group (N=898)

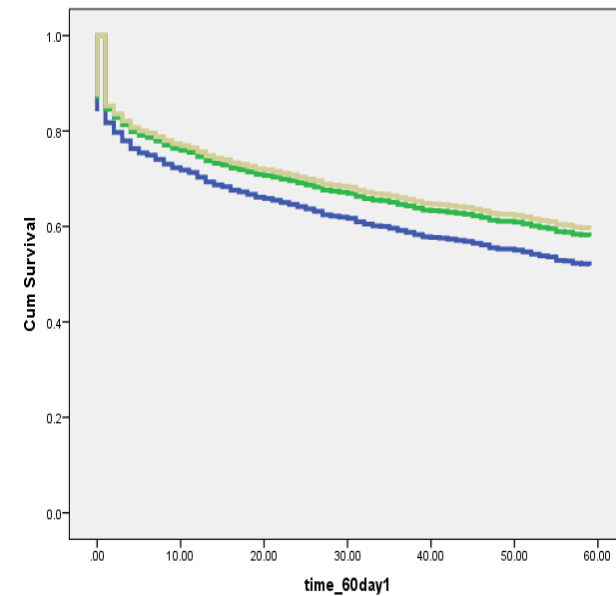

The interaction of haplotypes and treatment is significant (wald= 6.46, df=2, p=0.040).

Modeling days to relapse over 60 days in UW-TTURC study.

Haplotypes based on 2 SNPs (rs16969968, rs680244)

|        |       |                                       |
|--------|-------|---------------------------------------|
| H1=G_C | 20.8% | <span style="color: blue;">—</span>   |
| H2=G_T | 43.7% | <span style="color: green;">—</span>  |
| H3=A_C | 35.5% | <span style="color: yellow;">—</span> |

Figure S2. Treatment Effect Varies with Haplotypes on Ability to Quit Smoking (Time to Relapse)

**a. Haplotype H1 (G\_C):** N=422  
(20.8%)  
(54 placebo, 368 treatment)

RH=0.83, p=0.36

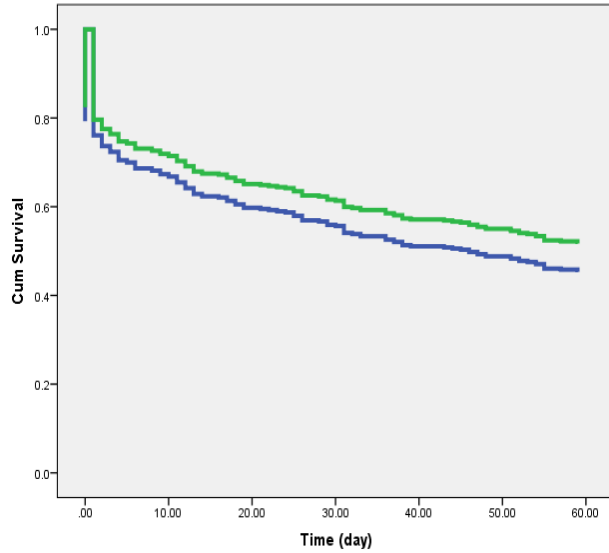

**b. Haplotype H2 (G\_T):** N=889  
(43.7%)  
(100 placebo, 789 treatment)

RH=0.48, p=2.7\*10<sup>-8</sup>

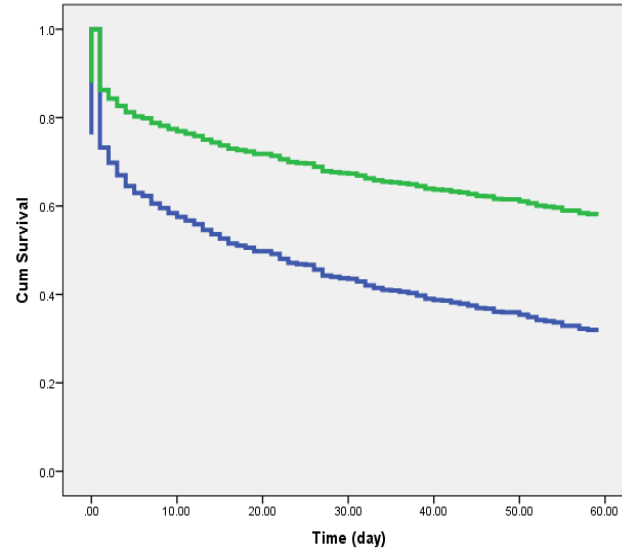

**c. Haplotype H3 (A\_C):** N=719  
(35.5%)  
(80 placebo, 639 treatment)

RH=0.48, p=9.7\*10<sup>-7</sup>

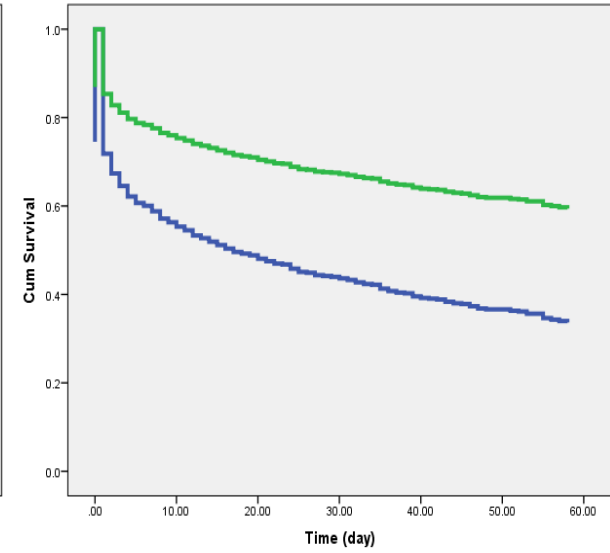

Placebo —————  
Active Treatment —————

Modeling RH (relative hazard) for relapse to smoking over 60 days in UW-TTURC study (1015 subjects).

Haplotypes based on 2 SNPs (rs16969968, rs680244)

Note- the N based on haplotypes is 2 times the number of subjects.

Figure S3. Haplotypic Risk on Ability to Quit Smoking for Each Active Treatments (Bupropion, Nicotine Replacement Therapy (NRT), Combined Bupropion and NRT)

a. Active Treatment group (N=898)

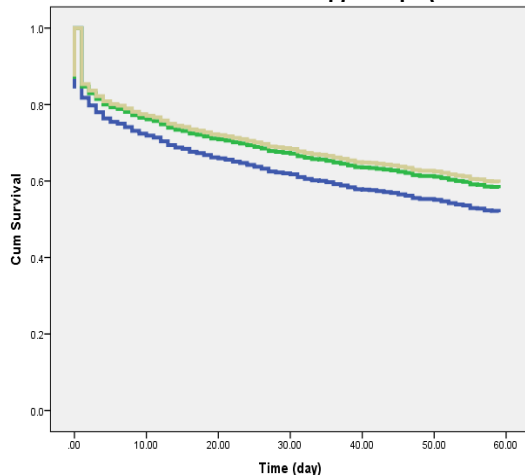

Haplotypes based on 2 SNPs  
(rs16969968, rs680244)

|        |       |                                       |
|--------|-------|---------------------------------------|
| H1=G_C | 20.8% | <span style="color: blue;">—</span>   |
| H2=G_T | 43.7% | <span style="color: green;">—</span>  |
| H3=A_C | 35.5% | <span style="color: yellow;">—</span> |

b. Bupropion group  
(N=179)

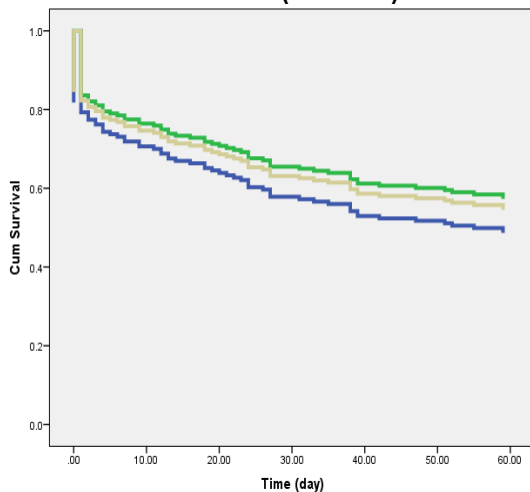

c. Nicotine Replacement group (NRT)  
(N=534)

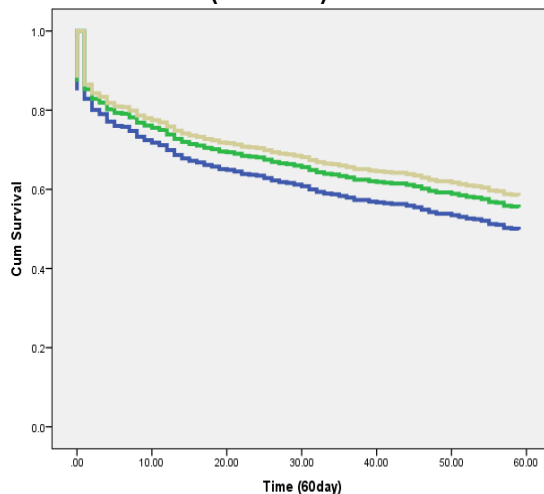

d. Combined Bupropion/NRT group  
(N=185)

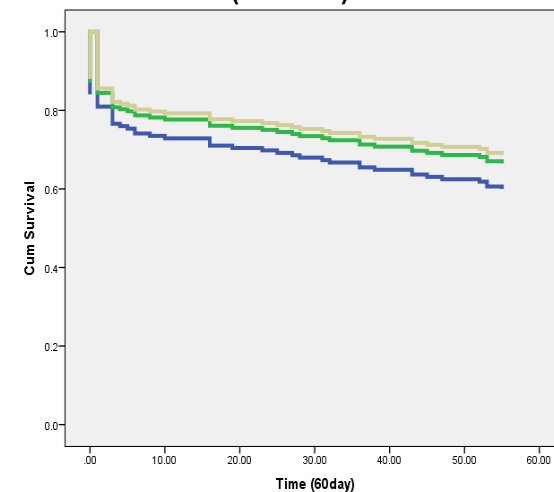

Haplotypic risk is not significant in predicting ability to quit (Wald=1.08, df=2, p=0.58).

No significant differences in haplotypic risks on ability to quit between groups (Wald=1.16, df=4, p=0.88).

Figure S4. Abstinence at End of Treatment Differs by Haplotypes in the Placebo Group, But Not in the Treatment Group

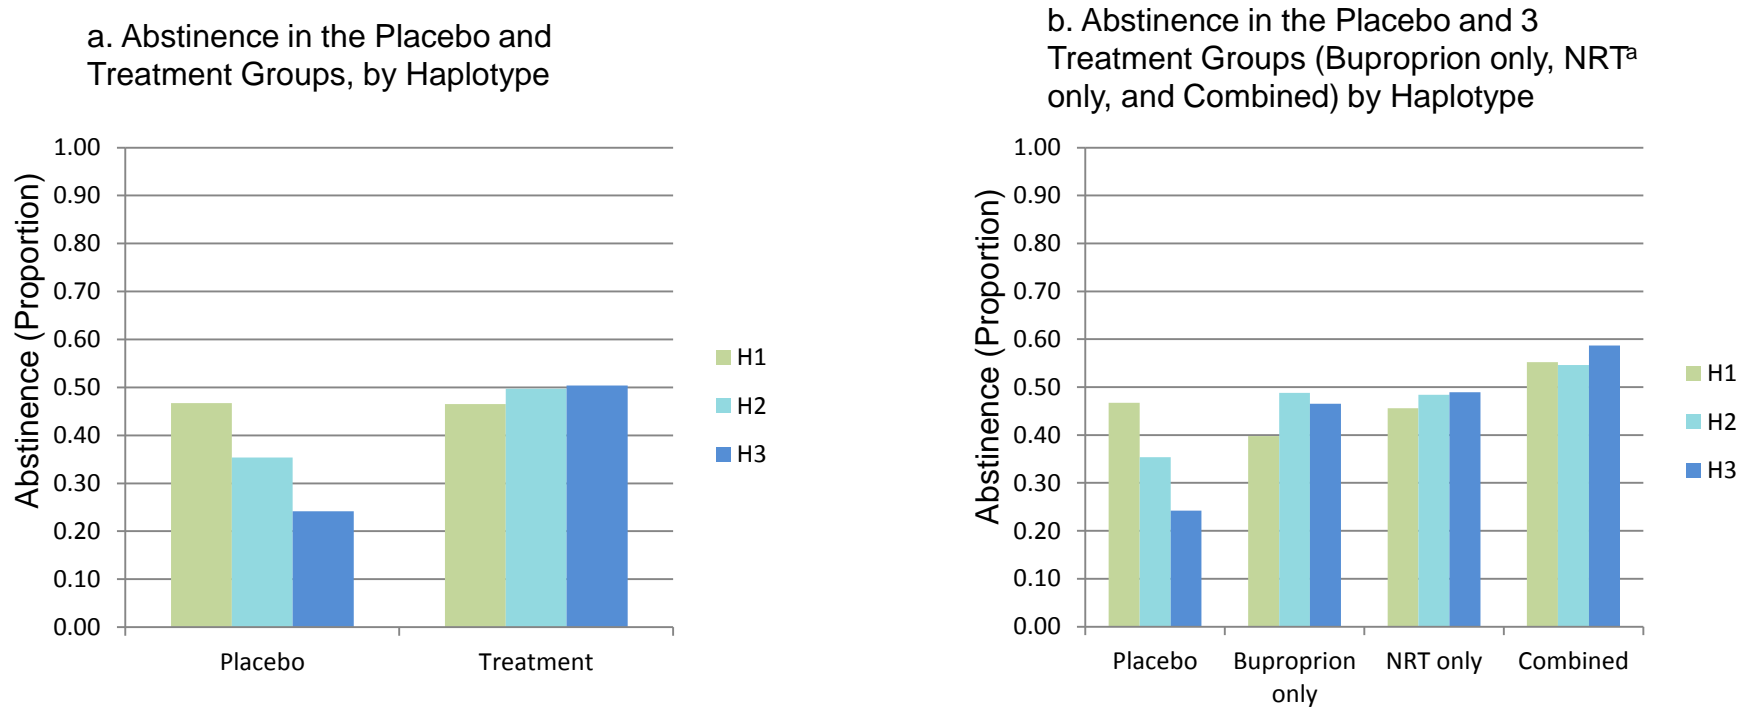

The interaction of haplotypes and treatment on abstinence is significant ( $X^2=8.97$ ,  $df=2$ ,  $p=0.011$ ).

<sup>a</sup>NRT: Nicotine Replacement Therapy

Abstinence is defined at end of 8 Week treatment. Odds ratios are adjusted for age and gender.

Haplotypes based on 2 SNPs (rs16969968, rs680244): H1=G\_C(20.8%), H2=G\_T(43.7%), H3=A\_C(35.5%).

N=1073 (132 in the placebo group; 941 in the treatment group (188 with Bupropion only, 563 with NRT only, and 190 with the combined group)).

**Table S1. Characteristics of the ARIC and UW-TTURC Samples**

|                                                 | Study           |                    |
|-------------------------------------------------|-----------------|--------------------|
|                                                 | ARIC<br>N=5,216 | UW-TTURC<br>N=1073 |
| <b>Age, mean ± (sd)</b>                         | 54.3 (5.7)      | 44.6 (11.4)        |
| <b>Gender, N (%)</b>                            |                 |                    |
| Female                                          | 2285 (43.8)     | 623 (58.1)         |
| Male                                            | 2931 (56.2)     | 450 (41.9)         |
| <b>Cigarettes per day, mean ± (sd)</b>          | 23.6 (13.6)     | 21.8 (9.04)        |
| <b>Haplotypes (rs16969968-rs680244*), N (%)</b> |                 |                    |
| H1- G_C                                         | 2547 (24.4)     | 447 (20.8)         |
| H2- G_T                                         | 4421 (42.4)     | 938 (43.7)         |
| H3- A_C                                         | 3464 (33.2)     | 761 (35.5)         |
| <b>Intervention, N (%)</b>                      |                 |                    |
| Placebo                                         | Not Applicable  | 132 (12.3)         |
| Active Treatment                                | Not Applicable  | 941 (87.7)         |

\* In the ARIC sample, rs951266 was used as a proxy for rs16969968 ( $r^2 = 0.97$  in CEU in 1000 Genomes database); rs6495306 was used as a proxy for rs680244 ( $r^2=1$  in CEU in 1000 Genomes database).

**Table S2. Modeling Smoking Heaviness (Cigarettes per Day) in the ARIC and UW-TTURC Samples\***

| Predictors                                | Study     |             |                       |          |               |      |
|-------------------------------------------|-----------|-------------|-----------------------|----------|---------------|------|
|                                           | ARIC      |             |                       | UW-TTURC |               |      |
|                                           | $\beta$   | 95% C.I.    | P                     | $\beta$  | 95% C.I.      | P    |
| <b>Haplotypes (rs16969968-rs680244**)</b> |           |             | (a)                   |          |               | (b)  |
| H1- G_C                                   | reference |             |                       |          |               |      |
| H2- G_T                                   | .097      | (.048, .15) | $8.9 \times 10^{-5}$  | 0.029    | (-0.055, .11) | .50  |
| H3- A_C                                   | .19       | (.14, .24)  | $8.1 \times 10^{-14}$ | 0.11     | (.019, .19)   | .017 |

\*All models were adjusted for age (quartiles) and gender.

\*\*In the ARIC sample, rs951266 was used as a proxy for rs16969968 ( $r^2 = 0.97$  in CEU in 1000 Genomes database); rs6495306 was used as a proxy for rs680244 ( $r^2=1$  in CEU in 1000 Genomes database).

(a) Wald=56.4, df=2, omnibus  $p=5.8 \times 10^{-13}$  for the overall haplotype effect.

(b) Wald=7.15, df=2, omnibus  $p=0.028$  for the overall haplotype effect.

**Table S3. Interaction of Haplotypes and Treatment Effect on Abstinence at End-of-Treatment, Adjusting for Smoking Heaviness (Cigarettes Smoked per Day) (N=1,073) \***

| Predictors                                        | Abstinence at End of Treatment |              |                       |
|---------------------------------------------------|--------------------------------|--------------|-----------------------|
|                                                   | Odds Ratio                     | 95% C.I.     | P                     |
| <b>Haplotypes (rs16969968-rs680244*)</b>          |                                |              |                       |
| H1- G_C                                           | reference                      |              |                       |
| H2- G_T                                           | 0.62                           | (0.32, 1.19) | 0.15                  |
| H3- A_C                                           | 0.39                           | (0.19, 0.80) | 0.010                 |
| <b>Cigarettes Per Day</b>                         | 0.67                           | (0.59, 0.75) | 3.6*10 <sup>-11</sup> |
| <b>Treatment</b>                                  |                                |              |                       |
| Placebo                                           | reference                      |              |                       |
| Active Treatment                                  | 0.99                           | (0.57, 1.73) | 0.98                  |
| <b>Interaction of Haplotypes and Intervention</b> |                                |              | (a)                   |
| H1* Active Treatment                              | reference                      |              |                       |
| H2* Active Treatment                              | 1.84                           | (0.92, 3.68) | 0.083                 |
| H3* Active Treatment                              | 3.08                           | (1.45, 6.53) | 0.0033                |

\* All models were adjusted for age (quartiles) and gender.

(a) chi squared=8.61, df=2, omnibus p=0.013 for the overall interaction effect.

**Table S4. Interaction of Haplotypes and Treatment Effect on Time to Relapse over 60 Days Post-quit in the UW-TTURC Study\* (N=1015)**

| <b>Predictors</b>                         | <b>Relative Hazard</b> | <b>95% C.I.</b> | <b>P</b> |
|-------------------------------------------|------------------------|-----------------|----------|
| <b>Haplotypes (rs16969968-rs680244**)</b> |                        |                 |          |
| H1- G_C                                   | reference              |                 |          |
| H2- G_T                                   | 1.40                   | (0.91, 2.16)    | 0.13     |
| H3- A_C                                   | 1.46                   | (0.93, 2.29)    | 0.10     |
| <b>Treatment</b>                          |                        |                 |          |
| Placebo                                   | reference              |                 |          |
| Active Treatment                          | 0.84                   | (0.56, 1.24)    | 0.37     |
| <b>Interaction</b>                        |                        |                 | (a)      |
| H1* Active Treatment                      | reference              |                 |          |
| H2* Active Treatment                      | 0.60                   | (0.37, 0.95)    | 0.031    |
| H3* Active Treatment                      | 0.54                   | (0.33, 0.89)    | 0.015    |

\*All models were adjusted for age (quartiles) and gender.

\*\*Haplotypes were based on rs16969968-rs680244.

(a) chi squared=6.46, df=2, omnibus p=0.040 for the overall haplotype effect.



**Table S5. Interaction of Haplotypes and Specific Treatment Effects on Abstinence at End-of-Treatment, Adjusting for Smoking Heaviness (Cigarettes Smoked per Day) (N=1,073) \***

| Predictors                                              | Abstinence at End of Treatment |              |        |
|---------------------------------------------------------|--------------------------------|--------------|--------|
|                                                         | Odds Ratio                     | 95% C.I.     | P      |
| <b>Haplotypes (rs16969968-rs680244*)</b>                |                                |              |        |
| H1- G_C                                                 | reference                      |              |        |
| H2- G_T                                                 | 0.62                           | (0.33, 1.17) | 0.14   |
| H3- A_C                                                 | 0.37                           | (0.18, 0.75) | 0.0057 |
| <b>Treatment</b>                                        |                                |              |        |
| Placebo                                                 | reference                      |              |        |
| Bupropion Only                                          | 0.74                           | (0.38,1.44)  | 0.37   |
| NRT Only                                                | 0.95                           | (0.54,1.69)  | 0.87   |
| Combined Bupropion/NRT                                  | 1.36                           | (0.70,2.64)  | 0.36   |
| <b>Interaction of Haplotypes and Bupropion</b>          |                                |              | (a)    |
| H1* Bupropion Only                                      | reference                      |              |        |
| H2* Bupropion Only                                      | 2.32                           | (1.01,5.35)  | 0.048  |
| H3* Bupropion Only                                      | 3.59                           | (1.46,8.82)  | 0.0053 |
| <b>Interaction of Haplotypes and NRT</b>                |                                |              | (b)    |
| H1* NRT Only                                            | reference                      |              |        |
| H2* NRT Only                                            | 1.79                           | (0.88,3.66)  | 0.11   |
| H3* NRT Only                                            | 2.99                           | (1.38,6.48)  | 0.0056 |
| <b>Interaction of Haplotypes and Combined Treatment</b> |                                |              | (c)    |
| H1* Combined Bupropion/NRT                              | reference                      |              |        |
| H2* Combined Bupropion/NRT                              | 1.61                           | (0.71,3.69)  | 0.26   |
| H3* Combined Bupropion/NRT                              | 3.14                           | (1.29,7.61)  | 0.011  |

No significant differences in haplotypic risks on ability to quit between 3 active treatment groups (Wald=1.21, df=4, p=0.88).

\* All models were adjusted for age (quartiles) and gender.

(a) chi squared=7.89, df=2, omnibus p=0.019 for the overall interaction effect.

(b) chi squared=7.68, df=2, omnibus p=0.021 for the overall interaction effect.

(c) chi squared=6.62, df=2, omnibus p=0.037 for the overall interaction effect.

**Table S6. Genotypic Risk for Age of Smoking Cessation (N=5,216) in the ARIC Study**

| Predictors                    | Age of Smoking Cessation |             |       |
|-------------------------------|--------------------------|-------------|-------|
|                               | Relative Hazard          | 95% C.I.    | P     |
| <b>Genotype (rs16969968*)</b> | 0.92                     | (0.86,0.99) | 0.018 |
| <b>Genotype (rs680244*)</b>   | 0.99                     | 0.93,1.05)  | 0.73  |

All models were adjusted for age (quartiles) and gender.  
Genotypes were coded additively as covariates.

\*In the ARIC sample, rs951266 was used as a proxy for rs16969968 ( $r^2 = 0.97$  in CEU in 1000 Genomes database); rs6495306 was used as a proxy for rs680244 ( $r^2=1$  in CEU in 1000 Genomes database).

**Table S7. Interaction of Genotypes (rs16969968, rs680244) and Treatment on Abstinence at End-of-Treatment, Adjusting for Smoking Heaviness (Cigarettes Smoked per Day) in the UW-TTURC Study (N=1,073) \***

| Predictors                                                       | Abstinence at End of Treatment |             |        |
|------------------------------------------------------------------|--------------------------------|-------------|--------|
|                                                                  | Odds Ratio                     | 95% C.I.    | P      |
| <b>Genotype (rs16969968)</b>                                     | 0.37                           | (0.18,0.77) | 0.0083 |
| <b>Genotype (rs680244)</b>                                       | 0.64                           | (0.34,1.22) | 0.17   |
| <b>Treatment</b>                                                 |                                |             |        |
| Placebo                                                          | reference                      |             |        |
| Active Treatment                                                 | 0.59                           | (0.21,1.67) | 0.32   |
| <b>Interaction of Genotype (rs16969968) and Active Treatment</b> | 3.24                           | (1.48,7.10) | 0.0032 |
| <b>Interaction of Genotype (rs680244) and Active Treatment</b>   | 1.78                           | (0.90,3.53) | 0.099  |

\* All models were adjusted for age (quartiles) and gender. Genotypes were coded additively as covariates.
